# 1 Individualized dynamic risk assessment for multiple 2 myeloma

3  
4  
5 Carl Murie<sup>1</sup>, Serdar Turkarslan<sup>1</sup>, Anoop Patel<sup>2</sup>, David G. Coffey<sup>3</sup>, Pamela S. Becker<sup>4</sup>, Nitin  
6 S. Baliga<sup>1,5,6,7,8, \*</sup>

7  
8 <sup>1</sup>Institute for Systems Biology; Seattle, WA, USA

9 <sup>2</sup>Department of Neurosurgery, Duke University; Durham, NC, USA

10 <sup>3</sup>Division of Myeloma, University of Miami, Miami; FL, USA

11 <sup>4</sup>Departments of Hematology and Hematopoietic Stem Cell Transplantation and Hematologic  
12 Malignancies Translational Science, City of Hope National Medical Center; Duarte, CA, USA

13 <sup>5</sup>Molecular Engineering and Sciences Institute, University of Washington; Seattle, WA, USA

14 <sup>6</sup>Departments of Biology and Microbiology, University of Washington; Seattle, WA, USA

15 <sup>7</sup>Molecular and Cellular Biology Program, University of Washington; Seattle, WA, USA

16 <sup>8</sup>Lawrence Berkeley National Lab, Berkeley; CA, USA

17

18 Running title: *Prognostic test for multiple myeloma*

19 \*corresponding author

20 Nitin S. Baliga: [nitin.baliga@isbscience.org](mailto:nitin.baliga@isbscience.org)

21 401 Terry Ave N

22 Seattle, WA 98109

23 T: 206.732.1266

24 ORCID: 0000-0001-9157-5974

25

26 **Abstract**

27 **Background.** Individualized treatment decisions for patients with multiple myeloma (MM)  
28 requires accurate risk stratification that takes into account patient-specific consequences  
29 of genetic abnormalities and tumor microenvironment on disease outcome and therapy  
30 responsiveness.

31 **Methods.** Previously, SYstems Genetic Network AnaLysis (SYGNAL) of multi-omics  
32 tumor profiles from 881 MM patients generated the mmSYGNAL network, which  
33 uncovered different causal and mechanistic drivers of genetic programs associated with  
34 disease progression across MM subtypes. Here, we have trained a machine learning (ML)  
35 algorithm on activities of mmSYGNAL programs within individual patient tumor samples  
36 to develop a risk classification scheme for MM that significantly outperformed  
37 cytogenetics, International Staging System, and multi-gene biomarker panels in  
38 predicting risk of PFS across four independent patient cohorts.

39 **Results.** We demonstrate that, unlike other tests, mmSYGNAL can accurately predict  
40 disease progression risk at primary diagnosis, pre- and post-transplant and even after  
41 multiple relapses, making it useful for individualized dynamic risk assessment throughout  
42 the disease trajectory.

43 **Conclusion.** mmSYGNAL provides improved individualized risk stratification that  
44 accounts for a patient's distinct set of genetic abnormalities and can monitor risk  
45 longitudinally as each patient's disease characteristics change.

46

47 **BACKGROUND**

48 Multiple Myeloma (MM) is characterized by uncontrolled proliferation of malignant plasma  
49 cells originating in the bone marrow and overproduction of monoclonal immunoglobulin  
50 or M-protein. Improvements in treatments based on better knowledge of underlying  
51 pathology have improved median overall survival (OS) to >6 years.<sup>(1)</sup> Prognosis is  
52 primarily assessed by revised International Staging System (R-ISS)<sup>(2)</sup> that combines  
53 levels of  $\beta$ -2 microglobulin, serum albumin, lactate dehydrogenase activity, and  
54 cytogenetics at diagnosis. Fluorescence *in situ* hybridization (FISH) is used to define high-  
55 risk MM based on the presence of specific cytogenetic abnormalities, including  
56 chromosomal translocations involving the immunoglobulin heavy chain (e.g., t(4;14) and  
57 t(14;16)), and amplifications of regions involving oncogenes (amp1q) or deletions of tumor  
58 suppressors (del(17p)) that portend a shorter progression-free survival (PFS) and OS.<sup>(3-  
59 7)</sup> While recent advancements like Seq-Fish show promise in improving the identification  
60 of chromosomal abnormalities and merit evaluation for their potential contributions to  
61 refining risk prediction models, FISH remains the current standard in most clinical  
62 laboratories.<sup>(8)</sup> However, FISH testing alone is insufficient to risk stratify MM since many  
63 patients with the same cytogenetic abnormality experience varied lengths of PFS and OS,  
64 suggesting potential to further improve outcomes with finer grained risk stratification.  
65 Accordingly, many studies have used gene expression profiling to better understand  
66 subtypes and stages of MM progression.<sup>(9-14)</sup> In particular, two multigene biomarker  
67 panels, SKY92 (EMC-92) and GEP70 (UAMS-70), that use expression patterns of 92 and  
68 70 genes, respectively, were commercialized into clinical tests to predict risk of disease  
69 progression.<sup>(15, 16)</sup> While gene expression panels are not routinely used in clinical practice  
70 they continue to play a role in advancing research efforts.<sup>(17-19)</sup> Recognizing their role in  
71 research, it is evident that there exists an unmet need to develop more accurate tools for  
72 risk assessment. In particular, a clinical test to longitudinally assess MM prognosis at  
73 various stages could prove transformational in improving outcomes by enabling dynamic  
74 calibration of personalized treatment plans based on the unique disease trajectory of each  
75 patient.<sup>(20-24)</sup>

76

77 Wall et al. advanced SYstems Genetic Network AnaLysis (SYGNAL) with Mining for

78 Node-Edge Relationships (MINER) to analyze multi-omics data from an 881 patient  
79 cohort and construct a transcriptional regulatory network for MM (mmSYGNAL).<sup>(25)</sup>  
80 mmSYGNAL delineated how subsets of mutations across the patient cohort causally  
81 modulated mechanistic regulators of co-regulated genes across ~3,000 regulons.  
82 Further, through clustering of regulons, mmSYGNAL identified 141 genetic programs  
83 whose activity profiles stratified patients into ~25 transcriptional states that were more  
84 predictive of clinical outcome than cytogenetic subtyping. In fact, the genetic programs  
85 also uncovered subtype-specific causal and mechanistic drivers of MM progression.  
86 Additionally, mmSYGNAL also explained how patients escaped treatment and relapsed,  
87 by providing insight into mechanisms of resistance manifesting from cellular and  
88 molecular interactions within the tumor microenvironment. mmSYGNAL demonstrated,  
89 for example, that network activity of targets of FDA-approved standard of care (SOC)  
90 drugs had decreased significantly at relapse, but also suggested that MM recurrence in  
91 some patients was associated with increased sensitivity to other investigational therapies.  
92 These findings suggested that mmSYGNAL could potentially serve as a prognostic as  
93 well as a predictive tool to stratify risk and to personalize therapy regimen based on the  
94 activity profiles of genetic programs containing drug targets.

95  
96 Here, we report a MM prognostic risk prediction framework based on mmSYGNAL  
97 program activity profiles within a patient's myeloma cells. Specifically, we applied elastic  
98 net regression to identify programs within the mmSYGNAL network, whose activity  
99 profiles accurately predicted risk of disease progression in each individual across the 881  
100 patient cohort. By training the ML algorithm on subsets of patients, we developed models  
101 that provided finer grade risk stratification within cytogenetic subtypes of MM. We have  
102 combined these models into an mmSYGNAL risk prediction framework that was tested  
103 on four independent MM cohorts (three microarray datasets from cohorts of newly  
104 diagnosed patients and one RNASeq dataset from a prospective double-blind study on a  
105 cohort of patients sampled at varied stages of the disease). These independent cohort  
106 studies demonstrated that risk prediction with mmSYGNAL significantly outperformed  
107 cytogenetics, ISS, and multi-gene biomarker panels (SKY92 and GEP70), especially  
108 across different disease stages, including primary diagnosis, pre- or post-transplant, and

109 even after multiple relapses. Finally, we discuss how the causal and mechanistic  
110 underpinnings of genetic programs used for risk prediction also provided actionable  
111 insight into the selection of appropriate therapies for each patient.

112

113 **Materials and Methods**

114 **Study Design.** The mmSYGNAL risk prediction models were generated with a training  
115 data set and performance was analyzed with six independent validation data sets. The  
116 Interim Analysis 12 (IA12) dataset from the CoMMpass study was acquired from the  
117 Multiple Myeloma Research Foundation (MMRF) and consisted of RNASeq and  
118 cytogenetic data for 881 patients and matched clinical outcomes for 769 patients.<sup>(26)</sup> The  
119 mmSYGNAL model was generated with the IA12 dataset in 2021 and while the newer  
120 IA18 dataset from the same CoMMpass study did not provide sufficient numbers of new  
121 patients to justify training a new model, it did provide an independent set of relapse  
122 patients for testing model performance. The RNASeq read counts were TMM normalized,  
123 transformed into TPM values, and Z-scored by each sample and across the cohort. Seven  
124 cytogenetic abnormality risk subtypes were identified in this cohort with six based on FISH  
125 (t(4;14), t(11;14), del(17p), del(1p), del(13), amp(1q)) and one based on overexpression  
126 of *FGFR3* as a proxy for t(4;14).<sup>(27, 28)</sup>

127  
128 Three Affymetrix data sets of 559 (GSE24080<sup>(29)</sup>), 282 (GSE19784<sup>(13)</sup>) and 426  
129 (GSE136337<sup>(30)</sup>) patients with matching clinical outcomes, were normalized as described  
130 in their respective papers. A fourth dataset obtained through the Seattle Cancer Care  
131 Institute (SCCA) consisted of RNASeq, cytogenetics and clinical outcome data for 23  
132 patients at varied disease stages.<sup>(31)</sup> The RNASeq data for the SCCA cohort was  
133 normalized similarly to the IA12 data set. Age and gender distributions for all data sets  
134 are shown in **Table 1**. Patients within each cohort were sub-grouped into low-, high-, and  
135 extreme-risk classes (**Table 2**) based on Guan scores (**Supplementary Methods**).<sup>(32)</sup>

136  
137 **Construction of risk prediction models based on genetic program activities within**  
138 **the mmSYGNAL network model.** mmSYGNAL is a transcriptional regulatory network  
139 model inferred from IA12 data (**Supplementary Methods**). Gene expression and survival  
140 data from the IA12 cohort (n=769) were used to build risk prediction models for all patients  
141 (subtype-agnostic), and for the seven cytogenetic abnormality risk subtypes (t(4;14),  
142 del(1p), del(13), amp(1q), and *FGFR3* (**Table S1**)). Programs were discretized as over  
143 (+1), neutral (0), or under (-1) active, based on distribution of z-scored values of member

144 genes, as described previously.(25) Clinical outcomes were transformed to Guan score  
145 and discretized to low-, high- and extreme-risk groups (**Fig. S1**).(32) Elastic net  
146 regression (with bootstrapping and jackknife cross-validation to avoid overfitting) was  
147 applied to identify programs whose activities could stratify patients into risk classes.  
148 Training was performed on all or subsets of patients to generate sub-type agnostic or  
149 subtype-specific models, respectively, except for del(17p) and t(11;14) subtypes, which  
150 had insufficient numbers of patients for model training.<sup>(33)</sup> Analysis of RNASeq profiles  
151 from CD138+ myeloma cells with appropriate models was used to classify patients into  
152 low- or high-risk if the score was less (or greater) than the standard machine learning  
153 cutoff of 0.5, and as 'extreme' if the score was >0.6. A cutoff of 0.6 also stratified  
154 approximately ~10% of all patients into extreme risk subgroup, which was consistent with  
155 the proportion of patients in this subgroup based on actual clinical outcome.

156

157 **Risk prediction using gene expression panels.** SKY92 and GEP70 risk scores were  
158 produced with R code from the DREAM challenge<sup>(34)</sup>, after ascertaining that our  
159 implementation reproduced Kaplan-Meier (KM) plots in the original papers (**Fig. S2**).  
160 Patients were classified as high- or low-risk if the score was higher or lower than a cutoff  
161 value reported in the original papers (SKY92=0.827 and GEP70=0.66).<sup>(15, 16)</sup>

162

163 **Statistical Analysis.** Log-rank tests were used to evaluate the risk stratification of KM  
164 curves, and AUCs of ROC curves were used to evaluate accuracy of risk prediction. (More  
165 details on statistical analysis are in **Supplementary Information: Methods**)

166

167 **RESULTS**

168 **mmSYGNAL scheme for predicting risk of disease progression for an individual**  
169 **MM patient**

170 Previous work has shown that activity profiles of 141 programs in the mmSYGNAL  
171 network grouped 881 MM patients in the IA12 cohort into 25 transcriptional states, each  
172 associated with distinct median length of PFS.<sup>(25)</sup> Interestingly, patients with the same  
173 chromosomal abnormality were distributed across multiple low- and high-risk states,  
174 which indicated that cytogenetics alone was insufficient to accurately estimate risk of  
175 disease progression. Remarkably, activities of just two programs sub-stratified patients  
176 within each cytogenetic subtype (e.g., t(4;14)) into extreme (median PFS ~5 months),  
177 high (median PFS ~22 months) or low (median PFS ~30 months) risk subgroups. Building  
178 on this observation, we applied elastic net regression and identified 25 programs whose  
179 activity patterns accurately stratified 769 IA12 patients into low-, high- and extreme-risk  
180 groups. This model, which was trained on all patients, will here onwards be referenced  
181 as the “subtype-agnostic model”. We investigated risk prediction on a cytogenetic subtype  
182 basis as MM is increasingly being considered as a collection of related diseases  
183 characterized by different cytogenetic abnormalities, prognoses and responses to  
184 therapy, with distinct transcriptional profiles.<sup>(35-37)</sup> Accordingly, for each of five cytogenetic  
185 subtypes, t(4;14), del(1p), del(13), amp(1q), and *FGFR3* (a proxy for t(4;14)), that were  
186 statistically well-represented in the patient cohort, a separate subtype-specific risk  
187 prediction model was trained (Methods). Performance of each model was evaluated on  
188 the IA12 dataset by calculating Area Under the Curve (AUC) of the Receiving Operating  
189 Characteristic (ROC) (**Fig. 1A**). Each risk model was assigned a grade based on their  
190 AUC score; t(4;14) and *FGFR3* models (AUC > 0.9) received an ‘A’ grade; amp(1q),  
191 del(1p), and del(13) (0.8 >AUC< 0.9) were assigned a ‘B’ grade, and subtype-agnostic  
192 model (AUC<0.8) was assigned a ‘C’ grade. Unsurprisingly, AUCs for combined ROC  
193 curves within A, B, and C grade models also rank ordered in a similar fashion with AUCs  
194 of 0.915, 0.848, and 0.724 respectively (**Fig. 1B**). There was significant separation  
195 between the low-, high- and extreme-risk survival curves (log rank test p-value<=1.2e-  
196 0.9) with distinct median PFS (34-44 months for the low-risk group, 19-28 months for the  
197 high-risk group and 6-14 months for the extreme-risk group; **Fig. 1C. Table 3**). Risk



198 prediction using all models across the 769 patients within the IA12 dataset yielded an  
199 AUC value of 0.77 (**Fig. 1D and E**).

200

201 **mmSYGNAL significantly outperforms cytogenetics in predicting risk of disease**  
202 **progression in MM**

203 Newly diagnosed MM patients with one or more high-risk chromosomal abnormalities,  
204 del(17p), t(4;14) and t(14;16), are considered by R-ISS to be at highest risk of disease  
205 progression<sup>3</sup>. However, there was high variability in disease outcome within cytogenetic  
206 subtypes and ISS stages across all data sets, which demonstrated that these  
207 classification methods are suboptimal in risk stratification (**Fig. S3**). We investigated the  
208 prognostic value of risk prediction based solely on cytogenetics by performing survival  
209 analysis of IA12 cohort patients stratified by the number of high-risk chromosomal  
210 abnormalities, viz. del(17p), t(4;14), t(14;16), and *FGFR3*. While the Kaplan-Meier (KM)  
211 plots showed proportional increase in risk of disease progression with the number of  
212 chromosomal abnormalities (**Fig. 2A, Table 4**), the number of cytogenetic abnormalities  
213 alone did a poor job of rank ordering patients on risk (AUC: 0.53) relative to the  
214 mmSYGNAL risk model (AUC: 0.65, **Fig. 2B**). While mmSYGNAL improved accuracy of  
215 predicting risk of disease progression in patients sub-grouped by numbers of high-risk  
216 cytogenetic abnormality (AUC=0.58), the overall performance was best with mmSYGNAL  
217 alone (AUC: 0.65). Finally, survival analysis also demonstrated that, relative to  
218 cytogenetic abnormalities, activities of transcriptional programs are better prognostic  
219 markers for MM (**Fig. 2C**).

220

221 **mmSYGNAL outperforms ISS and multigene biomarker panels GEP70 and SKY92**

222 We compared performance of mmSYGNAL risk prediction to GEP70 and SKY92, which  
223 use expression levels of 70 and 92 genes, respectively, to estimate risk of disease  
224 progression.<sup>(15, 16)</sup> The ISS prognostic classifier (the current standard R-ISS classification  
225 was not available) was also included as it is the standard of risk assessment for newly  
226 diagnosed patients.<sup>(2)</sup> Accuracy of risk classification by the four approaches was tested  
227 on three cohorts (IA12, GSE19784, GSE24080). While mmSYGNAL was trained on the

228 IA12 cohort (albeit with jackknife cross-validation to avoid overfitting), GSE19784 and  
229 GSE24080 were independent and as such served as ideal test datasets. Importantly,  
230 SKY92 was developed with GSE24080, and expected to perform best on this dataset.  
231 Moreover, both RNASeq (IA12) and microarray (GSE19784 and GSE24080) data are  
232 included allowing for assessment of model performance on disparate technology  
233 platforms.

234 The performance of mmSYGNAL, GEP70, and SKY92 were similar on the IA12 data set  
235 (AUCs of 0.65, 0.65, and 0.60, respectively) and GSE24080 (AUCs of 0.69, 0.70 and  
236 0.70, respectively). Interestingly, ISS performed the worst across all data sets with AUC  
237 scores of 0.61, 0.46 and 0.64 for IA12, GSE19784 and GSE24080, respectively. While  
238 mmSYGNAL performance on GSE19784 with an AUC of 0.65 was slightly lower than  
239 GEP70 (AUC: 0.69) and SKY92 (AUC: 0.73), further analysis revealed that this might be  
240 because the two panels had identified few high-risk patients in both cohorts (**Fig. 3A**). KM  
241 survival analysis demonstrated that mmSYGNAL, SKY92 and GEP70 were all effective  
242 in classifying patients into high- and low-risk groups (**Fig. 3B**), with median PFS values  
243 that were distinct for each dataset, but similar across all three approaches (**Table 5**).  
244 Again, ISS performance was the worst, particularly so for the GSE19784 data set with  
245 little separation between risk groups, and lower median PFS for Stage relative to Stages  
246 II and III. Importantly, only mmSYGNAL identified extreme-risk patients.

247 Finally, notwithstanding the significant overlap across methods, each method had  
248 identified distinct sets of high-risk patients (**Fig. 3C**). Interestingly, for the GSE19784  
249 cohort, while SKY92 and GEP70 correctly identified only 11 and 22 high-risk patients,  
250 respectively, mmSYGNAL correctly identified 40 high-risk patients. Thus, the higher true  
251 positive rate of the two gene panels in identifying high-risk patients (95% for SKY92 and  
252 100% for GEP70) relative to mmSYGNAL (82%) (**Fig. 3D**) came at the cost of significantly  
253 lower sensitivity, particularly so for SKY92.

254

255 **mmSYGNAL subtype-specific risk models outperform the subtype-agnostic model**  
256 Consistent with the hypothesis that MM is a collection of diseases characterized by  
257 different chromosomal abnormalities with distinct transcriptional profiles, overlapping but

258 distinct subsets of programs contributed to risk of disease progression for each subtype  
259 of MM (**Fig. S4**). While subtype-specific risk models significantly outperformed the  
260 subtype-agnostic model in the IA12 dataset (**Fig. 1A**), only the t(4;14) model could be  
261 evaluated on 13 and 27 t(4;14) patients in GSE19784 and GSE24080, respectively (**Table**  
262 **S1**). Therefore, performance of del(13) del(1p) and amp(1q) subtype-specific models  
263 were tested on a fourth dataset (GSE136337) with 77, 90, and 4 patients, respectively.  
264 While GEP70 or SKY92 risk scores could not be calculated due to unavailability of  
265 matching probe sets, the clinical metadata includes GEP70 risk classifications (high or  
266 low) and ISS stage for each patient. While all methods were effective at risk stratifying all  
267 patients (minimum p-value: 2.2e-04), the mmSYGNAL agnostic model outperformed  
268 GEP70 and ISS (**Fig. 4A-E**). Although median PFS for high- and low-risk groups (25 and  
269 51 months respectively) were similar for the agnostic model and GEP70, only the former  
270 identified an extreme-risk (median PFS: 16 months) (**Fig. 4F**). ISS performed worst with  
271 median PFS values ranging from 30 to 58 months (Stage I to Stage III). Performance of  
272 del(13) and del(1p) subtype-specific models was even better, especially in identifying  
273 high-risk (median PFS of 21 months) and extreme-risk groups (median PFS of 9.5 and 4  
274 months, respectively). The subtype-specific models were also better at rank ordering  
275 patients by risk, generating AUC scores of 0.62, 0.68 and 0.70 for the agnostic, del(1p)  
276 and del(13) subtypes, respectively (amp(1q) AUC was 1.0 albeit with only 4 samples). In  
277 sum, while cytogenetic abnormality alone was not a robust prognostic marker, subtype-  
278 specific mmSYGNAL models performed significantly better at predicting risk of disease  
279 progression, even relative to the subtype-agnostic risk model.

280  
281 **mmSYGNAL accurately predicts risk of PFS at varied disease stages, including**  
282 **after multiple relapses**

283 We investigated the effectiveness of the gene panels, mmSYGNAL and ISS for  
284 longitudinal monitoring of disease progression risk beyond primary diagnosis. We applied  
285 the three risk prediction methods and ISS to 86 relapse patients in the IA18 CoMMpass  
286 dataset, who were on their second or third line of treatment. mmSYGNAL outperformed  
287 all methods in stratifying patients into low and high/extreme risk groups (KM survival curve  
288 p-values: 0.0009 (mmSYGNAL), 0.012 (GEP70), 0.076 (SKY92) and 0.020 (ISS) (**Fig.**

289 **5A**). The median length of PFS for patients classified as extreme-risk by mmSYGNAL  
290 (2.1 months) was comparable to median PFS of patients classified as high-risk by SKY92  
291 and GEP70 (2.2 months for both). ISS stage III patients by contrast had significantly  
292 longer median PFS of 4.9 months; and there was minimal separation between survival  
293 curves for ISS Stage I (20 patients, median PFS: 8.4 months) and II (32 patient; median  
294 PFS: 8.1 months). mmSYGNAL also identified a group of high-risk patients with a median  
295 PFS of 6.1 months (**Fig. 5B**). Relative to high/extreme-risk patients, there was greater  
296 separation in mmSYGNAL survival curves for low-risk patients with median PFS of 8.1  
297 months, as compared to median PFS of 7.4 months for SKY92 and GEP70. Importantly,  
298 mmSYGNAL identified a greater number of patients as extreme or high-risk (41 patients)  
299 than both GEP70 (18 patients), SKY92 (21 patients, **Fig. 5C**).

300  
301 After establishing superior performance of mmSYGNAL in risk assessment of relapsed  
302 patients, we performed a double-blind study to evaluate performance of all methods  
303 across disease stages (primary diagnosis, pre- and post-transplants, and after multiple  
304 relapses). In this double-blind study, RNASeq was performed on CD138+ bone marrow  
305 mononuclear cells from 23 patients, including 8 newly diagnosed, 8 relapsed refractory  
306 (median of 5 relapses), and 7 pre- or post-transplant patients (SCCA). Notably, the cohort  
307 also represented diversity in clinical outcomes (OS: 9 -148 months and PFS: 0.7 to 52  
308 months; **Fig. 5D**). Of all approaches tested, only mmSYGNAL was accurate in risk  
309 stratification (**Fig. 5E**). Regardless of their disease stage, mmSYGNAL stratified the 23  
310 patients into distinct risk groups (p-value=0.001): 12 in the low-risk group, 7 in the high-  
311 risk group and 4 in the extreme-risk group. Although there was separation in survival  
312 curves of patients stratified by cytogenetics, the risk stratification was not significant (p-  
313 value=0.101), with longer median PFS for the extreme-risk group relative to the high-risk  
314 group (24 vs 3 months, respectively). By contrast, mmSYGNAL differentiated among all  
315 three risk groups with median PFS of 52 months for high-risk and 1 month for extreme-  
316 risk patients; the survival curve for the low-risk patients did not cross the 50% probability  
317 threshold (**Fig. 5E**). These results underscore the limitations of cytogenetics-based risk  
318 stratification, especially for patients with high-risk cytogenetic subtypes of MM, further  
319 motivating the need for a mmSYGNAL-type risk stratification approach.

320  
321 Risk prediction by both gene expression panels performed poorly across all patients, with  
322 GEP70 calling all but one patient (P-21) high-risk, and SKY92 stratifying all patients into  
323 the high-risk group (**Fig. S5**). Interestingly, while mmSYGNAL risk scores were inversely  
324 correlated with length of PFS across all patients ( $r = -0.38$ ), no correlation with PFS was  
325 observed for risk scores generated by SKY92 ( $r=0.1$ ) and GEP70 ( $r=0.01$ , **Fig. S5**).  
326 Except for patient P-21, all patients with multiple relapses (P-1, P-2, P-4, P-10, P-14, P-  
327 20, P-25) were classified as high-risk by cytogenetic subtyping (**Table S2**). Yet,  
328 mmSYGNAL sub-stratified these patients into extreme-risk (P-2, P-10 and P-20), high-  
329 risk (P-1 and P-4), and low-risk (P-14, P-21 and P-25). Apart from P-25, who was  
330 misdiagnosed as low-risk, mmSYGNAL risk categorization was accurate across all three  
331 risk groups (**Fig. 5F**). In fact, mmSYGNAL risk scores were significantly anticorrelated  
332 with length of PFS for all relapsed patients ( $r=-0.81$ ), even upon excluding P-21 ( $r=-0.64$ ),  
333 whose significantly longer PFS was an outlier. In contrast, the association between  
334 GEP70 and SKY92 risk scores and PFS were weaker, especially after removing P-21  
335 (GEP70:  $r = -0.01$ ; SKY92:  $r = -0.29$ ). Thus, this study demonstrated the effectiveness of  
336 mmSYGNAL for longitudinally monitoring the risk of disease progression in a patient,  
337 regardless of the stage of the disease –at primary diagnosis, pre- and post-transplant,  
338 and even after multiple relapses.

339  
340 **Risk-associated programs are significantly associated with targeted cancer**  
341 **therapies**

342 We hypothesized that the dynamic risk assessment capability of mmSYGNAL was likely  
343 because the model was built upon causal and mechanistic principles, which could also  
344 potentially aid in drug discovery and therapy selection. To test this hypothesis, we  
345 performed survival analysis and discovered that only 25 of the total 141 programs had  
346 contributed significantly in varied weighted combinations to risk prediction by at least one  
347 model (**Fig. 6A**). While 14 programs were essential for risk prediction by a single model  
348 (e.g., Pr-98 for amp1(q) model, and Pr-110 for the subtype-agnostic model), 11 programs  
349 were important across multiple models (e.g., Pr-61 (4 models), Pr-104 (5 models) and Pr-  
350 0 (5 models)). Strikingly, under-activity of 20 programs predicted poor PFS, whereas over-

351 activity of just 5 programs were associated with poor prognosis. The under- and over-  
352 activity of risk stratifying programs was consistent with dysregulation of similar gene sets  
353 in other cancers with poor prognosis. For example, Pr-0, a significant prognostic marker  
354 of disease progression across all subtype-specific models, was enriched for genes that  
355 have been associated with at least four other cancers (angioimmunoblastic lymphoma,  
356 leukemia, neuroblastoma, and bladder cancer).<sup>(38-41)</sup> Another evidence for mechanistic  
357 association of risk stratifying programs with etiology of MM was the overrepresentation of  
358 genes that are differentially regulated during early and late stages of normal differentiation  
359 from tonsil B cells -> tonsil plasma cells -> bone marrow plasma cells, with distinct  
360 expression patterns in MM plasma cells<sup>(9)</sup> (**Table S3, File S2**).

361  
362 If the programs were causally and mechanistically associated with disease progression,  
363 then we predicted that they should contain a significant number of targets of anticancer  
364 drugs, including MM therapies. Indeed, the 25 risk-associated programs were significantly  
365 enriched (Fischer exact test p-value=0.0003) for targets of 129 out of 399 drugs used for  
366 MM, in a Phase IV cancer trial, or in at least a Phase I MM trial. Strikingly, consistent with  
367 their mechanism of action, targets of 28 agonists and 88 antagonists were in programs  
368 associated with bad prognosis when they were under- and over-active, respectively  
369 (Fisher exact test p-value=0.0006; **Supplementary Methods**). This list included targets  
370 of drugs used in SOC for MM, such as dexamethasone<sup>(42, 43)</sup> and prednisone<sup>32,33</sup> both of  
371 which are agonists that target the human glucocorticoid receptor NR3C1, a TF of regulon  
372 R-3191 in Pr-104. Specifically, mmSYGNAL implicated NR3C1 in transcriptional  
373 activation of regulons within Pr-104 (Cox HR=0.66, 95% CI=(0.57, 0.77), p-value= $1.510^{-7}$ )  
374 and Pr-110 (Cox HR=0.67, 95% CI=(0.56, 0.80), p-value= $9.610^{-6}$ ), and Pr-69, which  
375 was not included in the risk models but had significant risk association (Cox HR=1.52,  
376 95% CI=(0.1.29, 0.1.81), p-value= $7.410^{-7}$ ). In all three cases (Pr-104, Pr-110, Pr-69) an  
377 agonist acting on NR3C1 would differentially regulate each program in a therapeutic  
378 direction, i.e., towards a low-risk state (up-regulating Pr-104 and Pr-110 and down-  
379 regulating Pr-69) (**Fig 6B** and **Fig. S6**). Thus, these findings demonstrate the potential for  
380 leveraging the causal and mechanistic association of risk-associated programs to further  
381 develop mmSYGNAL into a predictive test for discovery of novel targets, repurposing

382 drugs approved for other indications, and selecting therapeutic interventions based on  
383 the activity profiles of disease-driving programs in each patient.  
384

385 **DISCUSSION**

386 Personalized clinical care decisions including treatment selection for newly diagnosed  
387 MM patients is based on prognostic biomarkers such as chromosomal abnormalities that  
388 are still hindered by significant variability in survival outcomes. Given the poor accuracy  
389 of cytogenetics and the lack of use of gene expression panels there is an unmet need for  
390 improved risk assessment tools in the clinical setting. For example, in the IA12 cohort,  
391 53% of patients with t(4;14) or *FGFR3* (high-risk chromosomal abnormalities) actually had  
392 good prognosis (long PFS). Alternatively, presumed low-risk patients with t(11;14) or no  
393 chromosomal abnormalities had significant proportions (37% and 32%, respectively) with  
394 shorter PFS.<sup>(25)</sup> In this regard, risk stratification based on mmSYGNAL program activities  
395 significantly improved risk stratification, even within cytogenetic subtypes, demonstrating  
396 that transcriptional states of myeloma cells are more accurate than cytogenetic  
397 abnormalities at predicting disease progression. Furthermore, our risk prediction models  
398 were tested using the IA12 data, incorporating updated cytogenetic annotations derived  
399 from Seq-FISH classifications. The results showed comparable or improved performance,  
400 underscoring the robustness and accuracy of our models (**Supplementary Information**  
401 **S7**). Interestingly, GEP70 and SKY92 also performed comparably across IA12,  
402 GSE19784 and GSE24080, further demonstrating that gene expression patterns do  
403 indeed contain valuable information regarding disease etiology. However, only  
404 mmSYGNAL was accurate in predicting dynamic risk across the disease trajectory of a  
405 patient.

406  
407 The relatively poorer risk prediction by cytogenetics and gene expression panels,  
408 especially in later stages of MM, is likely because they are based on correlates of clinical  
409 outcomes and not directly associated with causal and mechanistic drivers of disease  
410 progression. The myriad mutations in myeloma cells of MM patients act in complex  
411 combinations that are both contextual in the bone marrow microenvironment and too large  
412 in number to model in a statistically significant manner. However, the consequences of  
413 the mutations were captured by mmSYGNAL in the architecture and activity patterns of  
414 regulons and programs that were associated with disease progression in a biologically  
415 and clinically meaningful manner.<sup>(25)</sup> Additionally, the improvement of cytogenetics-based



416 risk stratification upon including program activity suggests that other mutations as well as  
417 non-genetic factors, such as the microenvironment, have major influence on disease  
418 prognosis.<sup>(44-48)</sup> While it is complicated to measure specific microenvironment  
419 characteristics, the activity patterns of regulons and programs within mmSYGNAL already  
420 seems to account for many of these non-genetic influences as previously demonstrated  
421 by its ability to recapitulate mechanisms of microenvironment-induced drug resistance  
422 and immune suppression within the bone marrow of relapse patients.<sup>(25)</sup> There is great  
423 potential to further improve the predictive power of mmSYGNAL by incorporating other  
424 risk factors considered in the R-ISS, including proportion of plasma cells and other cell  
425 types in the bone marrow aspirate and M-protein abundance –information that was  
426 unfortunately not available for any of the multiple patient cohorts analyzed in this study.

427  
428 In addition to a prognostic tool for dynamic risk assessment of MM patients, there is also  
429 a need for a predictive tool that can inform clinicians on selecting non-SOC drugs matched  
430 to the characteristics of a patient's disease. In particular, while there is broad consensus  
431 on SOC therapy for MM, there is greater uncertainty for choosing drugs for relapsed  
432 refractory MM patients.<sup>(4, 49-51)</sup> In this regard, mmSYGNAL could be developed further into  
433 a predictive tool for discovering and tailoring existing and new therapies to the unique  
434 biological characteristics of a patient's disease. Our discovery that FDA-approved anti-  
435 cancer therapies (in particular SOC and investigational MM drugs) were enriched within  
436 risk-associated programs lends credibility to this strategy. Specifically, our findings  
437 suggest that activity patterns of disease-associated programs in myeloma cells could be  
438 leveraged in a rational approach to select appropriate therapies, including novel drugs.  
439 For instance, Pr-0 and Pr-86, associated with bad prognosis when under-active, were  
440 enriched in genes that were upregulated in myeloma cells exposed to Aplidin (plitidepsin,  
441 enrichment p-values: 5.37E-10 and 2.23E-2, respectively). Aplidin, a marine-derived anti-  
442 myeloma compound, inhibits proliferation of myeloma cells by inducing apoptosis<sup>(52)</sup> and  
443 is in Phase 3 clinical trial (NCT01102426) in combination with dexamethasone for  
444 relapsed refractory MM.<sup>(53)</sup> We hypothesize that high-risk patients with under-active Pr-0  
445 and Pr-86 would likely benefit from Aplidin treatment (see **File S2** for additional examples  
446 for selecting drugs based on program activity profiles). Thus, by virtue of its causal and

447 mechanistic association with the etiology and progression of MM, mmSYGNAL has the  
448 demonstrated utility as a prognostic tool for individualized dynamic risk assessment along  
449 the disease trajectory, and the potential for development into a predictive tool for selecting  
450 treatments that specifically target disease drivers in each patient.

451 **Additional Information**

452 **Author contributions:** N.S.B., P.S.B. and D.G.C conceived the project and designed  
453 experiments. P.S.B and D.G.C. provided and curated the patient-derived biopsy tumor  
454 specimens and RNA-seq data. C.M., S.T., A.P., P.S.B., D.G.C., and N.S.B. performed  
455 and/or contributed to data analysis and interpretation. C.M., S.T., A.P., P.S.B., D.G.C.,  
456 and N.S.B. drafted and edited the manuscript.

457 **Data availability:**

458 Data. Microarray data are available at: GSE19784, GSE24080 and GSE136337. IA12  
459 and IA18 data can be requested from MMRF. SCCA data can be requested from  
460 [pbecker@coh.org](mailto:pbecker@coh.org).

461 Code.

462 mmSYGNAL risk prediction models: [https://github.com/baliga-lab/mmSYGNAL-risk-](https://github.com/baliga-lab/mmSYGNAL-risk-prediction-models)  
463 [prediction-models](https://github.com/baliga-lab/mmSYGNAL-risk-prediction-models)

464 mmSYGNAL (original code base): <https://github.com/baliga-lab/miner>

465 MINER (updated interface): <https://github.com/baliga-lab/miner3>

466

467 **Competing interests:**

468 NB is a co-founder and member of the Board of Directors of Sygnomics, Inc., which will  
469 commercialize the SYGNAL technology. AP and ST have equity stakes in Sygnomics,  
470 Inc. The terms of these arrangements have been reviewed and approved by ISB and  
471 Duke University in accordance with their conflict-of-interest policies. PB received  
472 institutional research support from Glycomimetics, Pfizer, Notable labs, and is an advisor  
473 to Accordant Health Services (CVS Caremark).

474

475 **Funding Information:** This work was supported by a NCI-5R01AI141953-04 (N.S.B.),  
476 NSF1565166 (N.S.B.), NCI-5R01CA259469-02, NSF2042948. And Washington  
477 Research Foundation Funding (N.S.B.), a grant from the Brotman Baty Institute for  
478 Precision Medicine (UW) Catalytic Collaboration Grant (DGC and PSB), and a private

479 donation to the University of Washington Foundation. This research was funded in part  
480 through the NIH/NCI Cancer Center Support Grant P30 CA015704 (PI Thomas Lynch,  
481 MD). The Multiple Myeloma Research Foundation generously made available the Interim  
482 Analysis 12 (IA12) version of the CoMMpass clinical trial data.  
483

484 **Tables**

485

486 **Table 1: Age and gender distributions of patients in the training and validation data sets.**

487 Model was trained on the IA12 data and validated with the GSE19768, GSE24080, SCCA,  
 488 GSE136337 and IA18 relapse data sets. Note that 6 patients in the IA18 relapse data set have  
 489 both second- and third-line treatments and are thus repeated in the analysis which resulted in a  
 490 total of 86 samples.

491

|            | <b>IA12<br/>(n=769)</b> |             | <b>GSE19784<br/>(n=282)</b> |             | <b>GSE24080<br/>(n=559)</b> |             | <b>SCCA<br/>(n=23)</b> |             | <b>GSE136337<br/>(n=426)</b> |             | <b>IA18<br/>relapse<br/>n=(80)</b> |             |
|------------|-------------------------|-------------|-----------------------------|-------------|-----------------------------|-------------|------------------------|-------------|------------------------------|-------------|------------------------------------|-------------|
| <b>Age</b> | <b>Female</b>           | <b>Male</b> | <b>Female</b>               | <b>Male</b> | <b>Female</b>               | <b>Male</b> | <b>Female</b>          | <b>Male</b> | <b>Female</b>                | <b>Male</b> | <b>Female</b>                      | <b>Male</b> |
| 25-35      | 0                       | 3           | 1                           | 3           | 0                           | 1           | 0                      | 0           | 2                            | 0           | 0                                  | 0           |
| 35-45      | 9                       | 14          | 14                          | 17          | 3                           | 3           | 1                      | 0           | 15                           | 21          | 2                                  | 1           |
| 45-55      | 40                      | 55          | 31                          | 52          | 24                          | 31          | 3                      | 3           | 42                           | 57          | 3                                  | 3           |
| 55-65      | 78                      | 117         | 72                          | 86          | 62                          | 89          | 6                      | 2           | 64                           | 106         | 6                                  | 14          |
| 65-75      | 87                      | 129         | 3                           | 3           | 81                          | 129         | 2                      | 2           | 41                           | 77          | 15                                 | 17          |
| 75-85      | 37                      | 49          | 0                           | 0           | 50                          | 80          | 1                      | 3           | 1                            | 0           | 9                                  | 10          |
| 85-95      | 6                       | 9           | 0                           | 0           | 2                           | 4           | 0                      | 0           | 0                            | 0           | 0                                  | 0           |

492

493 **Table 2: Clinical risk group PFS and relapse cutoffs generated from analysis of Guan**  
494 **scores.** Guan scores transform survival data, PFS and relapse events, into a single numerical  
495 risk score ranging from 0 (low risk) to 1 (high risk). The inflection point for the rank ordered Guan  
496 scores for each of the three training (GSE19784, GSE24080, GSE136337) and test (IA12) data  
497 sets was identified numerically (Guan=0.5) and used as the separation point between high- and  
498 low-risk subjects. The 8 month cutoff for extreme-risk patients was based on half the median  
499 progress free survival of high-risk subjects found in Shah et al(54). The PFS values mapped from  
500 the Guan score inflection point risk cutoff were virtually identical across all data sets.

| <b><i>Risk</i></b>    | <b><i>Relapse</i></b> | <b><i>PFS (months)</i></b>         |
|-----------------------|-----------------------|------------------------------------|
| <b><i>extreme</i></b> | yes                   | <= 8 months                        |
| <b><i>high</i></b>    | yes                   | < 33.5 months and > 8 months       |
| <b><i>low</i></b>     | any                   | Not in extreme- or high-risk group |

501

502 **Table 3: Median PFS (months) and predicted risk classification sample sizes for the three**  
503 **mmSYGNAL grades.**

| <b>Grade</b> | <b>Median PFS (months)</b> |             |            | <b>n</b>       |             |            |
|--------------|----------------------------|-------------|------------|----------------|-------------|------------|
|              | <b>extreme</b>             | <b>high</b> | <b>low</b> | <b>extreme</b> | <b>high</b> | <b>low</b> |
| <b>A</b>     | 20.0                       | 20.8        | 45.2       | 37             | 10          | 59         |
| <b>B</b>     | 14.2                       | 23.6        | 45.2       | 37             | 31          | 257        |
| <b>C</b>     | 11.3                       | 23.9        | 41.3       | 37             | 90          | 642        |

504

505 **Table 4: Median PFS (months) for the high-risk cytogenetic subtype count groups.**

| <b><i>Number of abnormalities</i></b> | <b><i>median PFS (months)</i></b> | <b><i>n</i></b> |
|---------------------------------------|-----------------------------------|-----------------|
| <b><i>4</i></b>                       | 12.7                              | 5               |
| <b><i>3</i></b>                       | 23.8                              | 33              |
| <b><i>2</i></b>                       | 30.1                              | 81              |
| <b><i>1</i></b>                       | 32.6                              | 194             |
| <b><i>0</i></b>                       | 39.1                              | 456             |

506



507 **Table 5: Median PFS (months) for mmSYGNAL, GEP70, and SKY92 across the IA12,**  
 508 **GSE19784 and GSE24080 data.**

| <b>Datasets:</b>    | <b>IA12</b>    |             |            | <b>GSE19784</b> |             |            | <b>GSE24080</b> |             |            |
|---------------------|----------------|-------------|------------|-----------------|-------------|------------|-----------------|-------------|------------|
| <b>methods</b>      | <b>extreme</b> | <b>high</b> | <b>low</b> | <b>extreme</b>  | <b>high</b> | <b>low</b> | <b>extreme</b>  | <b>high</b> | <b>low</b> |
| <b>mmSYGNAL</b>     | 18.4           | 27.4        | 39.9       | 8.9             | 20.7        | 31.5       | 12.1            | 28.7        | 74.1       |
| <b>GEP70</b>        | NA             | 20.0        | 40.5       | NA              | 6.3         | 30.6       | NA              | 20.8        | 74.1       |
| <b>SKY92</b>        | NA             | 15.8        | 39.1       | NA              | 3.4         | 28.9       | NA              | 22.3        | 74.6       |
| <b>ISS category</b> | III            | II          | I          | III             | II          | I          | III             | II          | I          |
| <b>ISS</b>          | 26.4           | 29.7        | 48.7       | 26.2            | 37.3        | 23.4       | 37.4            | 65.9        | 77.6       |

509

510 **Figures**

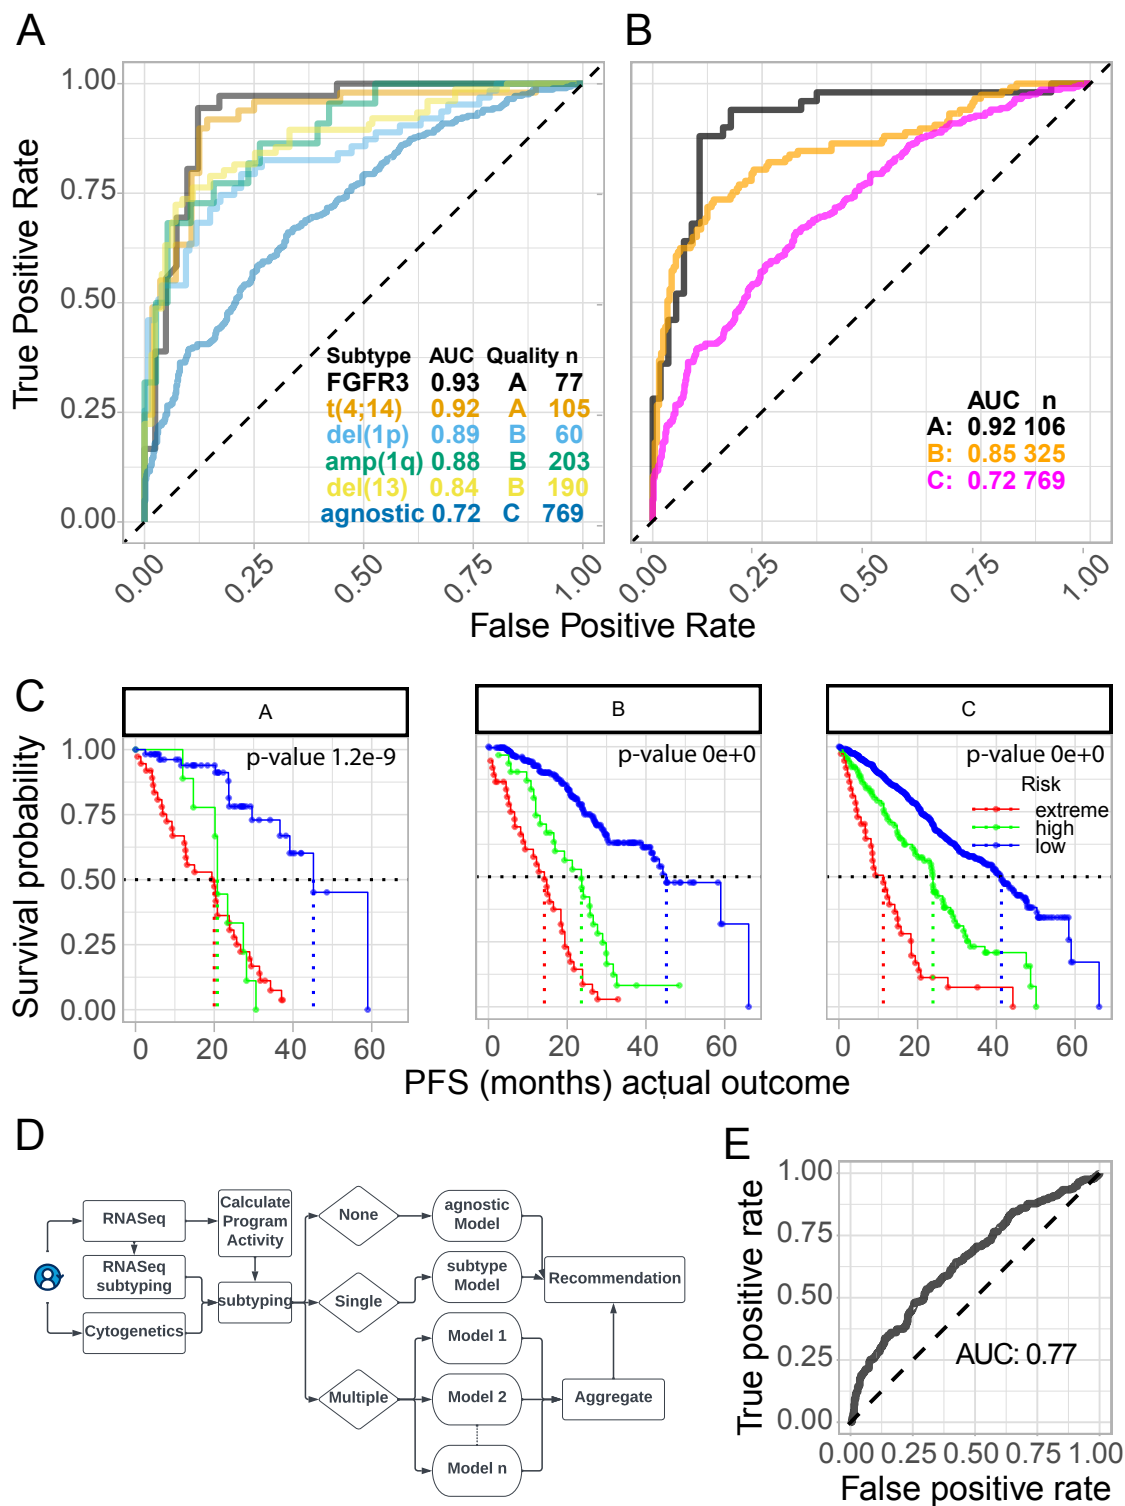

511  
 512 **Fig 1: Performance of mmSYGNAL genetic subtype-specific risk and graded models. (A)**  
 513 ROC curves and sample sizes (n) of subtype specific mmSYGNAL risk models applied to 769

514 IA12 MM patients. Subtype risk models are organized into 3 grades based on their respective  
515 AUC scores ( $A \geq 0.9$ ,  $0.9 < B \geq 0.8$ ,  $C < 0.8$ ). **(B)** ROC curves for the IA12 patients grouped  
516 by the grade of the subtypes exhibited by each patient. A patient may be included in multiple  
517 graded groups if they exhibit multiple subtypes. If a patient exhibits 2 or more subtypes in a single  
518 grade, then the mean of the risk scores is used. **(C)** Survival plots associated with each grade  
519 with Kaplan-Meier log-rank test p-values. **(D)** Scheme for precision risk prediction for new patients  
520 using the “best” model(s). Per this scheme, the risk score of a patient that exhibits multiple  
521 subtypes is calculated using the highest-grade risk prediction model ( $A > B > C$ ). For example, if  
522 a patient exhibited both the t(4;14) and the amp(1q) subtypes then the patient’s risk score would  
523 be based on t(4;14) subtype model, which had an A grade, rather than the amp(1q) subtype  
524 model, which was determined to be of B grade. If a patient exhibits multiple subtypes that are  
525 associated with equivalent graded models, then the risk score is calculated as the mean of scores  
526 generated by the highest-grade models. The patient’s risk classification defaults to the C grade  
527 subtype-agnostic model if their MM subtype is not represented by any of the subtype-specific  
528 models. **(E)** ROC curve of the mmSYGNAL best quality risk prediction scheme as described in  
529 (D) for the 769 IA12 patients. Extreme risk patients are considered as high risk in the ROC  
530 analysis.  
531

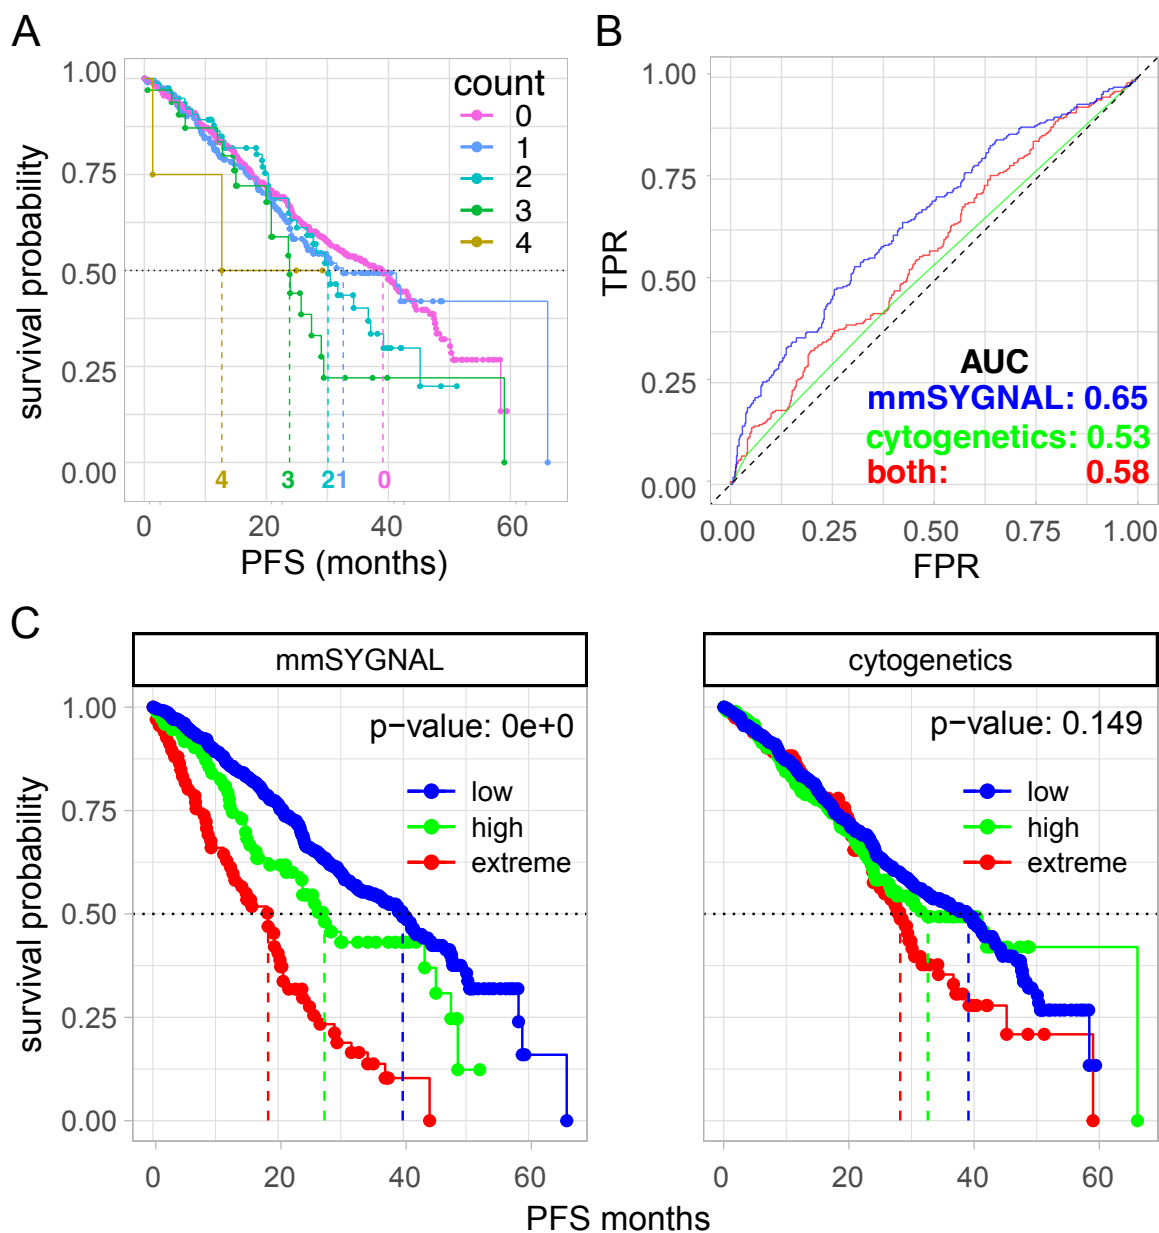

532

533 **Fig. 2: Performance of best quality mmSYGNAL model and cytogenetics.** (A) Survival curve  
534 of risk stratification based on number of high-risk cytogenetic subtypes ( $t(4;14)$ ,  $t(4;16)$ ,  $del(17p)$ ,  
535  $FGFR3$ ,  $amp(1q)$ ) exhibited by each patient (0 to 4). (B) ROC curve risk ordering based on  
536 mmSYGNAL best model, cytogenetics, and patients ordered by mmSYGNAL risk probability  
537 within each cytogenetic count group ("both"). (C) Survival curves and KM log-rank p-values for  
538 mmSYGNAL best model and cytogenetics risk classification (patients showing zero, one, or more  
539 than one high-risk cytogenetic abnormality are considered as low-, high- and extreme-risk groups  
540 respectively).

Prognostic test for Multiple Myeloma

Murie et al.

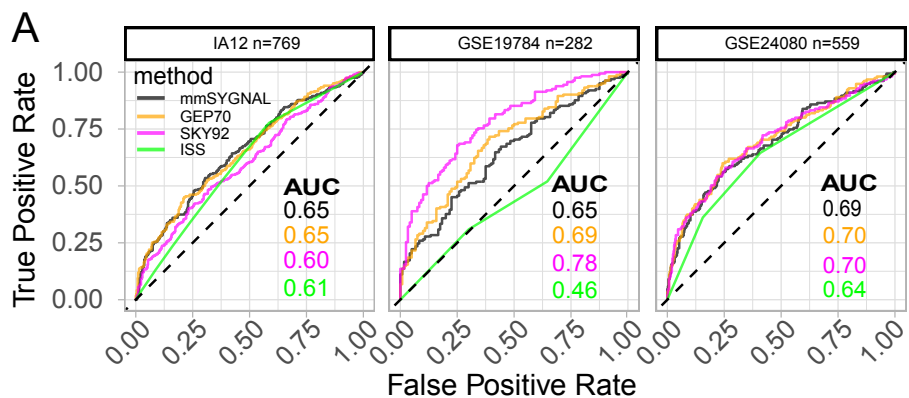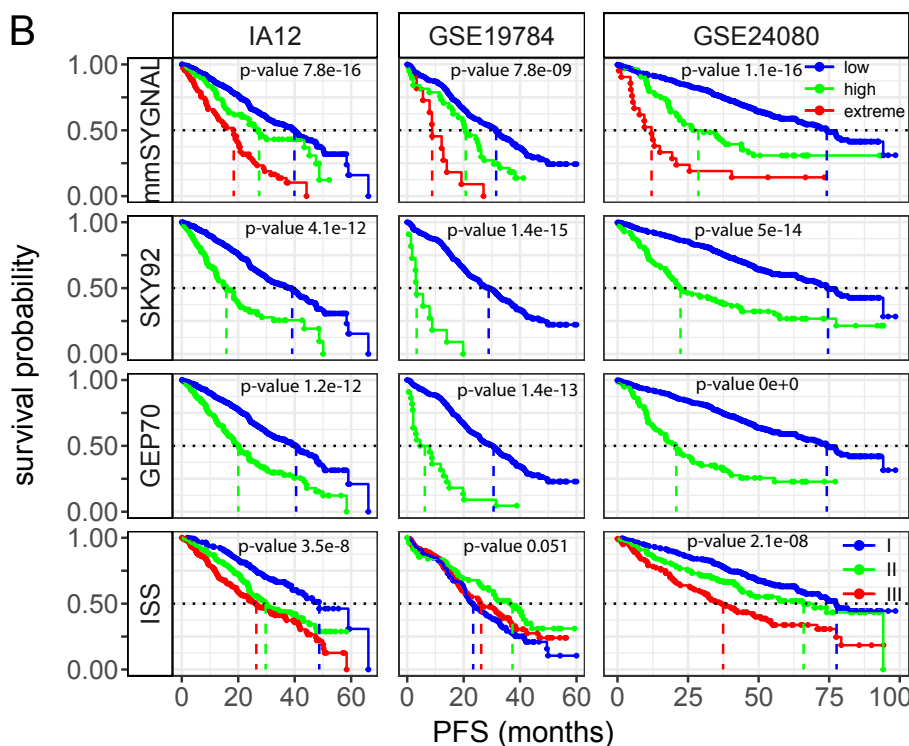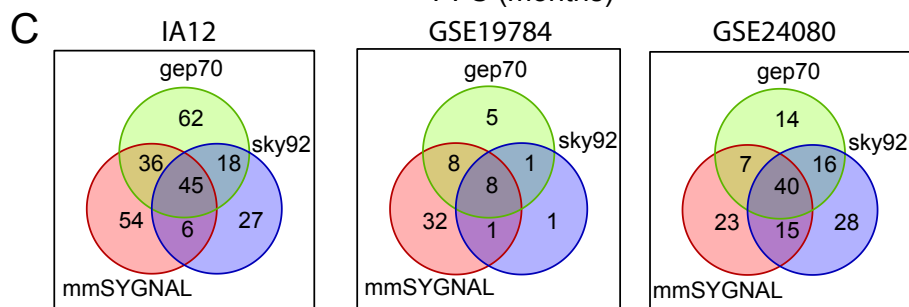

**D** risk method correct classification %

| clinical | IA12  |       |          | GSE19784 |       |          | GSE24080 |       |          |
|----------|-------|-------|----------|----------|-------|----------|----------|-------|----------|
|          | GEP70 | SKY92 | mmSYGNAL | GEP70    | SKY92 | mmSYGNAL | GEP70    | SKY92 | mmSYGNAL |
| high     | 58    | 58    | 60       | 95       | 100   | 82       | 65       | 59    | 59       |
| low      | 68    | 66    | 68       | 46       | 44    | 48       | 78       | 79    | 78       |

**E** clinical outcome false positive rate %

| clinical | IA12  |       |          | GSE19784 |       |          | GSE24080 |       |          |
|----------|-------|-------|----------|----------|-------|----------|----------|-------|----------|
|          | GEP70 | SKY92 | mmSYGNAL | GEP70    | SKY92 | mmSYGNAL | GEP70    | SKY92 | mmSYGNAL |
| high     | 67    | 80    | 71       | 87       | 93    | 75       | 68       | 63    | 68       |
| low      | 14    | 8     | 12       | 1        | 0     | 8        | 7        | 10    | 9        |

542 **Fig. 3: Risk prediction results for mmSYGNAL, GEP70, SKY92 and ISS.** Methods were  
543 applied to the IA12 training data and two microarray validation data sets (GSE19784 and  
544 GSE24080) **(A)** ROC curves and their respective AUC scores for mmSYGNAL, GEP70 and  
545 SKY92. **(B)** Survival curves and KM log-rank p-values for mmSYGNAL, GEP70, SKY92 and ISS.  
546 All survival curves showed very low p-values. minimum p-value: 3.5e-8 except for ISS with  
547 GSE19784. **(C)** Overlap of patients that have been classified as high-risk (high- or extreme-risk  
548 for mmSYGNAL) **(D)** Percentage of correct calls made within the respective methods high- and  
549 low-risk classification groups. For example, 58% of the patients classified as high-risk by GEP70  
550 applied to the IA12 data were also high-risk patients according to clinical outcome. **(E)** Table of  
551 false positive rates for high (high and extreme) and low risk classification groups.  
552

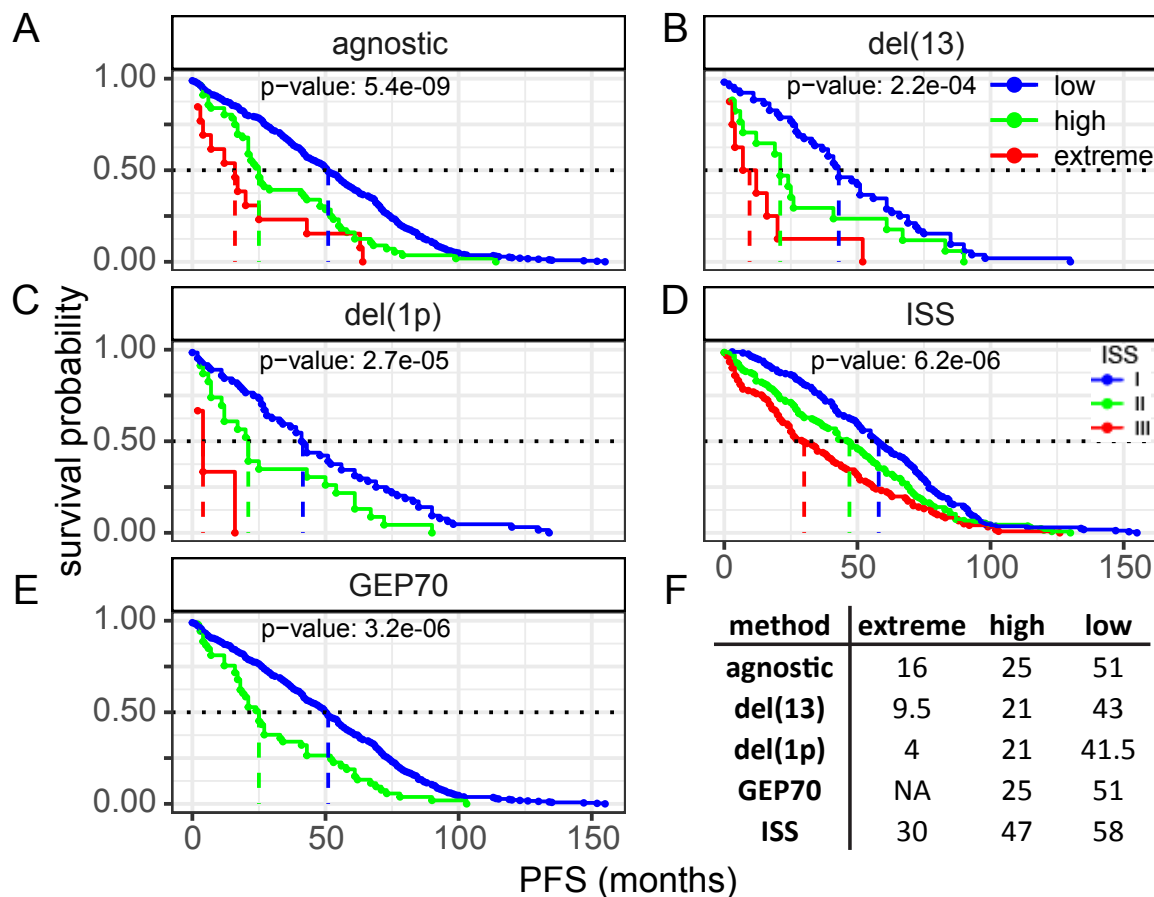

553  
 554 **Fig. 4: Performance of mmSYGNAL agnostic and subtype-specific models, GEP70 and ISS**  
 555 **in the GSE136337 cohort.** While we were not able to generate GEP70 or SKY92 risk scores  
 556 from the processed expression data in the public repository due to unavailability of matching  
 557 probe sets, the clinical metadata did include the GEP70 risk classifications (high or low) and the  
 558 ISS stages for each patient and are thus shown in the analysis. Survival curves and KM log-rank  
 559 p-values for (A) agnostic, (B) del(13) (C) ISS and (D) del(1p) and (E) GEP70 risk models. (F) Table  
 560 of median PFS scores for all methods which correspond to the colored vertical dashed lines in  
 561 the survival curves (red = extreme- risk or ISS stage III, green = high-risk or ISS stage II and blue=  
 562 low-risk or ISS stage I).  
 563

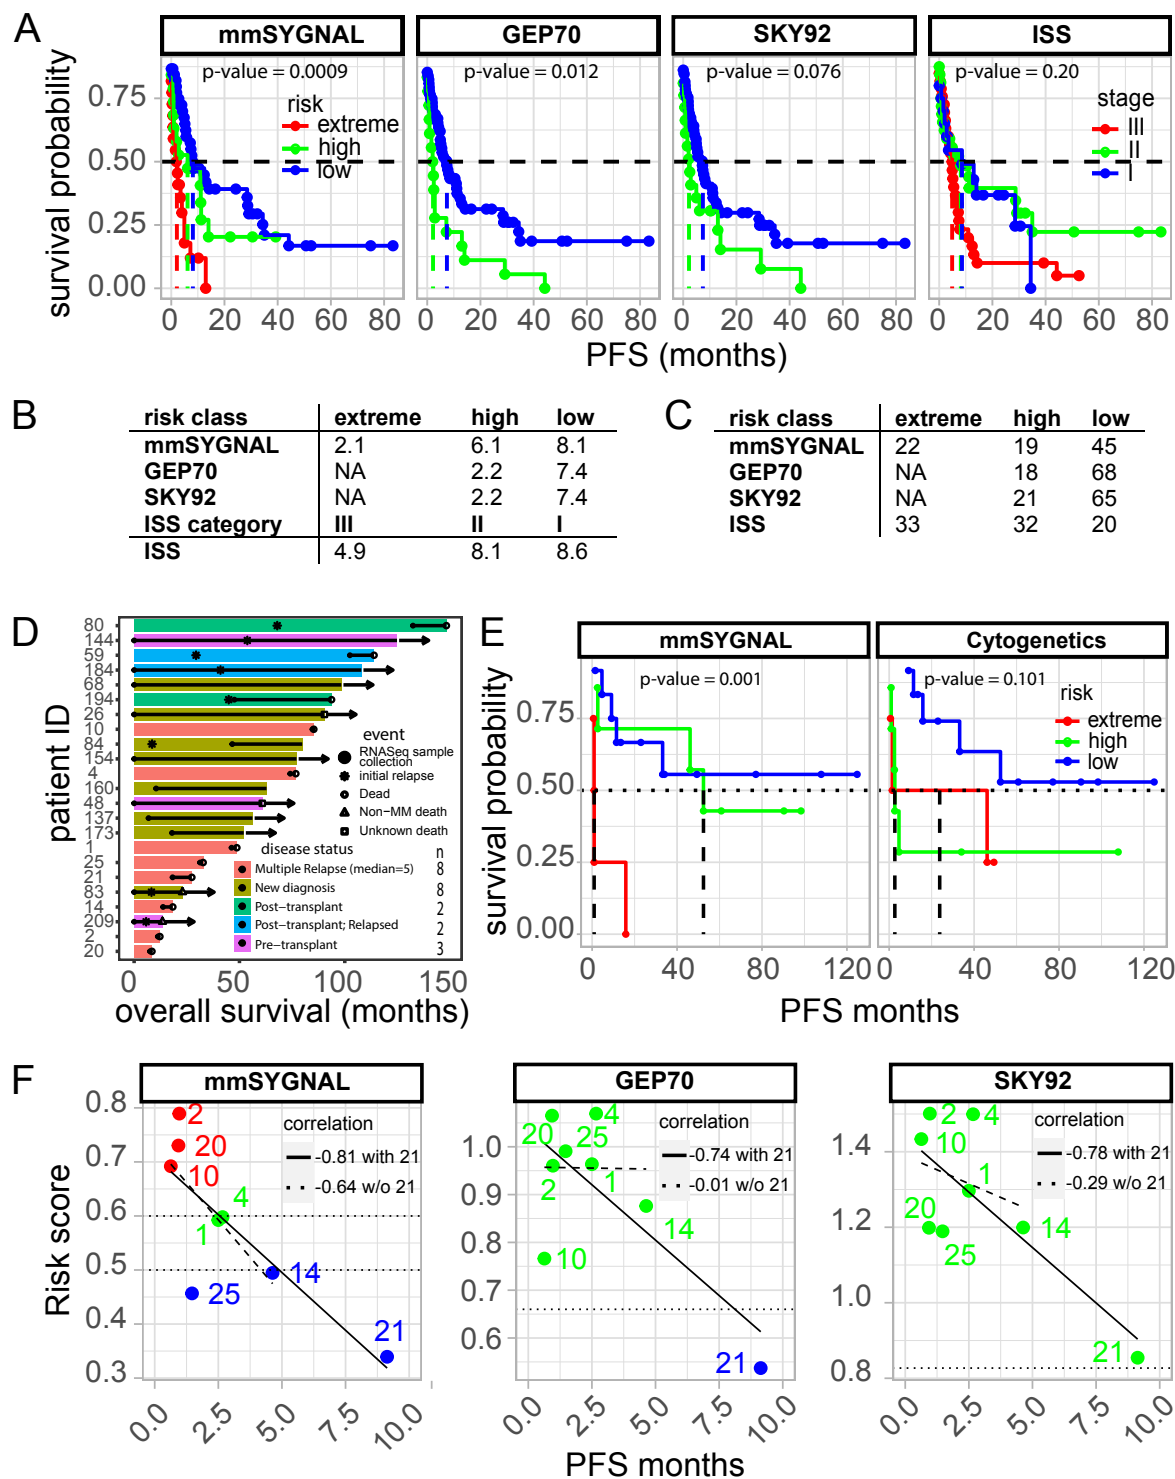

564  
 565 **Fig. 5: Descriptive and performance plots for mmSYGNAL, GEP70 and SKY92 applied to**  
 566 **relapse patients.** Methods were applied to 23 SCCA patients and 86 IA18 CoMMpass patients.  
 567 **(A)** Survival curves for mmSYGNAL, GEP70, SKY92 and ISS applied to relapse patients from  
 568 the IA18 CoMMpass trial (n=86). Tables showing the **(B)** median PFS values for each method



569 and **(C)** sample sizes of predicted risk classifications for each method (one patient was missing  
570 ISS classification). **(D)** Swimmer plots for the SCCA patients. The arrows indicate that a patient  
571 is still going through treatment while those without arrows are either deceased or are not being  
572 followed clinically. The solid circles indicate when the RNASeq samples were obtained, and the  
573 solid lines show how long a patient was on a particular treatment before a relapse or refractory  
574 event (including death). Note that there is a mixture of samples taken at initial diagnosis and  
575 samples taken at different times along the disease trajectory. **(E)** Survival curves and KM log-  
576 rank p-values for mmSYGNAL and cytogenetics risk classification. Cytogenetic classification  
577 where low-, high- and extreme-risk categories are based on whether a patient exhibits either 0,  
578 1, or more than one high-risk subtype, respectively. **(F)** Scatter plots and associated Pearson's  
579 correlations of mmSYGNAL, GEP70 and SKY92 risk scores vs PFS (months) for the 8 multiple  
580 relapse/refractory patients. Patient 21's PFS value is an outlier and thus correlations with and  
581 without that patient's PFS identify how strongly the outlier influences correlation.  
582

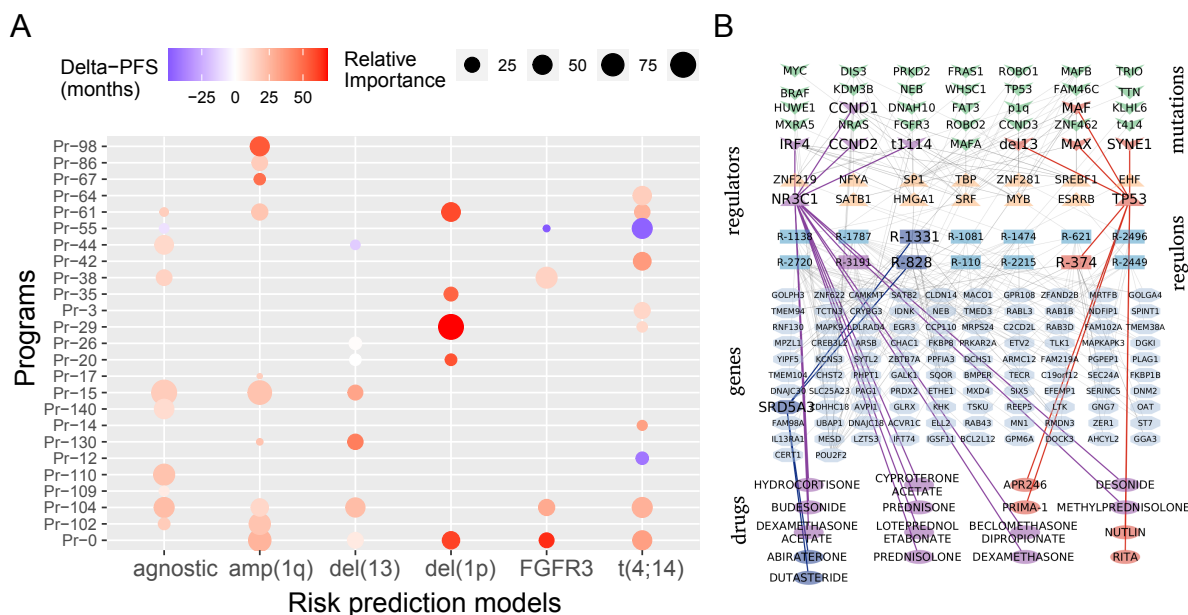

583

584

**Fig. 6: Risk-associated programs provide mechanistic insights into the biology of**

585

**disease progression and therapy selection. (A)** Relative importance of programs in risk

586

prediction by subtype-agnostic and each subtype-specific model. Twenty-five programs that

587

were associated with distinct survival outcomes (based on KM analysis, log-rank test p-value

588

<0.05) contributed significantly to risk prediction by at least one model. A number of the 25

589

programs were significant for multiple programs which resulted in a total of 41 instances of a

590

risk-associated program showing significance for a particular subtype. Size of each bubble is

591

proportional to relative importance of a given program in estimating risk as determined by the

592

scaled (0-100) absolute value of the t-statistic for each program generated by the elastic net

593

linear regression model. Color shading of bubbles indicates the difference in median PFS of

594

patients when the program is over-active vs. when it is under-active. For instance, Pr-29

595

contributed the most to the del(1p) risk model (size of bubble); median PFS of patients when

596

this program was under-active was 50 months shorter relative to when it was over-active (dark

597

red bubble). **(B)** The causal mechanistic flow of the regulatory network for Pr-104. The network

598

diagram depicts SYGNAL inferred causal influences of 35 mutations on modulating 14 TFs that

599

were implicated in mechanistic regulation of 102 genes within 14 regulons of Pr-104.

600

Furthermore, 17 drugs in clinical trials for MM (any phase) or any other cancer (Phase IV) are

601

shown with their respective causal flows highlighted (mutations, regulators or genes). Two

602

causal networks show drug targets, NR3C1 (purple) and TP53 (orange), that are regulators of

603

program Pr-104 regulons and a third where the drug target, SRD53 (yellow) is a member of two

604

Pr-104 regulons.

605 **Supplementary Materials:**

606 Material and methods

607 Table S1

608 Table S2

609 Table S3

610 Fig. S1

611 Fig. S2

612 Fig. S3

613 Fig. S4

614 Fig. S5

615 Fig.S6

616 Fig S7

617 Data File S2

618

619 **Definitions:**

620 mmSYGNAL: multiple myeloma SYstems Genetic Network AnaLysis

621 MM: Multiple Myeloma

622 OS: Overall Survival

623 PFS: Progress Free Survival

624 FISH: Flourescent In Situ Hybridization

625 MINER: MIning for Node-Edge Relationships

626 AUC: Area Under the Curve

627 ROC: Reciever Operating Curve

628 R-ISS: Revised International Staging System

629 ISS: International Staging System

630 KM: Kaplan-Meier

631 IA12: Interim Analysis 12

632 IA18: Interim Analysis 18

633 GEP: Gene Expression Profile

634 CoMMpass: Relating Clinical Outcomes in MM to Personal Assessment of Genetic

635 Profile

- 636 SCCA: Seattle Cancer Care Alliance
- 637 FDA: US Food and Drug Association
- 638 MMRF: Multiple Myeloma Research Foundation
- 639 TMM: Trimmed Mean of M values
- 640 TPM: Transcript Per Million
- 641 DREAM: **D**ialogue for **R**everse **E**ngineering **A**ssessment and **M**ethods
- 642

643 **References**

- 644 1. Rajkumar SV. Myeloma Today: Disease Definitions and Treatment Advances. American  
645 journal of hematology. 2016;91(1):90-100.
- 646 2. Rajkumar SV, Dimopoulos MA, Palumbo A, Blade J, Merlini G, Mateos M-V, et al.  
647 International Myeloma Working Group updated criteria for the diagnosis of multiple myeloma. The  
648 Lancet Oncology. 2014;15(12):e538-48.
- 649 3. Palumbo A, Avet-Loiseau H, Oliva S, Lokhorst HM, Goldschmidt H, Rosinol L, et al.  
650 Revised International Staging System for Multiple Myeloma: A Report From International  
651 Myeloma Working Group. Journal of Clinical Oncology. 2015;33(26):2863-9.
- 652 4. Kumar SK, Rajkumar V, Kyle RA, van Duin M, Sonneveld P, Mateos M-V, et al. Multiple  
653 myeloma. Nature Reviews Disease Primers. 2017;3:17046.
- 654 5. Manier S, Salem KZ, Park J, Landau DA, Getz G, Ghobrial IM. Genomic complexity of  
655 multiple myeloma and its clinical implications. Nature Reviews Clinical Oncology. 2017;14(2):100-  
656 13.
- 657 6. Sonneveld P, Avet-Loiseau H, Lonial S, Usmani S, Siegel D, Anderson KC, et al.  
658 Treatment of multiple myeloma with high-risk cytogenetics: a consensus of the International  
659 Myeloma Working Group. Blood. 2016;127(24):2955-62.
- 660 7. Hanamura I. Multiple myeloma with high-risk cytogenetics and its treatment approach. Int  
661 J Hematol. 2022;115(6):762-77.
- 662 8. Miller C YJ, Derome M, Donnely A, Marrian J, McBride K, Auclair D, Keats J. A  
663 Comparison of Clinical FISH and Sequencing Based FISH Estimates in Multiple Myeloma: An  
664 Mmrf Commpass Analysis. Blood. 2016;128(22):374.
- 665 9. Zhan F, Huang Y, Colla S, Stewart JP, Hanamura I, Gupta S, et al. The molecular  
666 classification of multiple myeloma. Blood. 2006;108(6):2020-8.
- 667 10. Agnelli L, Biccato S, Fabris S, Baldini L, Morabito F, Intini D, et al. Integrative genomic  
668 analysis reveals distinct transcriptional and genetic features associated with chromosome 13  
669 deletion in multiple myeloma. Haematologica. 2007;92(1):56-65.
- 670 11. Decaux O, Lodé L, Magrangeas F, Charbonnel C, Gouraud W, Jézéquel P, et al.  
671 Prediction of Survival in Multiple Myeloma Based on Gene Expression Profiles Reveals Cell Cycle  
672 and Chromosomal Instability Signatures in High-Risk Patients and Hyperdiploid Signatures in  
673 Low-Risk Patients: A Study of the Intergroupe Francophone du Myélome. Journal of Clinical  
674 Oncology. 2008;26(29):4798-805.

- 675 12. Chng WJ, Kumar S, VanWier S, Ahmann G, Price-Troska T, Henderson K, et al. Molecular  
676 Dissection of Hyperdiploid Multiple Myeloma by Gene Expression Profiling. *Cancer Research*.  
677 2007;67(7):2982-9.
- 678 13. Broyl A, Hose D, Lokhorst H, de Knegt Y, Peeters J, Jauch A, et al. Gene expression  
679 profiling for molecular classification of multiple myeloma in newly diagnosed patients. *Blood*.  
680 2010;116(14):2543-53.
- 681 14. Shaughnessy JD, Qu P, Usmani S, Heuck CJ, Zhang Q, Zhou Y, et al. Pharmacogenomics  
682 of bortezomib test-dosing identifies hyperexpression of proteasome genes, especially PSMD4,  
683 as novel high-risk feature in myeloma treated with Total Therapy 3. *Blood*. 2011;118(13):3512-  
684 24.
- 685 15. Kuiper R, Broyl A, de Knegt Y, van Vliet MH, van Beers EH, van der Holt B, et al. A gene  
686 expression signature for high-risk multiple myeloma. *Leukemia*. 2012;26(11):2406-13.
- 687 16. Shaughnessy JD, Zhan F, Burington BE, Huang Y, Colla S, Hanamura I, et al. A validated  
688 gene expression model of high-risk multiple myeloma is defined by deregulated expression of  
689 genes mapping to chromosome 1. *Blood*. 2007;109(6):2276-84.
- 690 17. Kuiper R, Zweegman S, van Duin M, van Vliet MH, van Beers EH, Dumeé B, et al.  
691 Prognostic and predictive performance of R-ISS with SKY92 in older patients with multiple  
692 myeloma: the HOVON-87/NMSG-18 trial. *Blood Adv*. 2020;4(24):6298-309.
- 693 18. Chen YT, Valent ET, van Beers EH, Kuiper R, Oliva S, Haferlach T, et al. Prognostic gene  
694 expression analysis in a retrospective, multinational cohort of 155 multiple myeloma patients  
695 treated outside clinical trials. *Int J Lab Hematol*. 2022;44(1):127-34.
- 696 19. Mohan M, Weinhold N, Schinke C, Thanedrarajan S, Rasche L, Sawyer JR, et al.  
697 Daratumumab in high-risk relapsed/refractory multiple myeloma patients: adverse effect of  
698 chromosome 1q21 gain/amplification and GEP70 status on outcome. *Br J Haematol*.  
699 2020;189(1):67-71.
- 700 20. van Es N. Dynamic prediction modeling for cancer-associated venous thromboembolism.  
701 *Journal of Thrombosis and Haemostasis*. 2020;18(6):1276-7.
- 702 21. Alexander M, Ball D, Solomon B, MacManus M, Manser R, Riedel B, et al. Dynamic  
703 Thromboembolic Risk Modelling to Target Appropriate Preventative Strategies for Patients with  
704 Non-Small Cell Lung Cancer. *Cancers*. 2019;11(1):50.
- 705 22. Kurtz DM, Esfahani MS, Scherer F, Soo J, Jin MC, Liu CL, et al. Dynamic Risk Profiling  
706 Using Serial Tumor Biomarkers for Personalized Outcome Prediction. *Cell*. 2019;178(3):699-  
707 713.e19.

- 708 23. Park Y, Kim BK, Park JY, Kim DY, Ahn SH, Han K-H, et al. Feasibility of dynamic risk  
709 assessment for patients with repeated trans-arterial chemoembolization for hepatocellular  
710 carcinoma. *BMC Cancer*. 2019;19:363.
- 711 24. Pitoia F, Jerkovich F. Dynamic risk assessment in patients with differentiated thyroid  
712 cancer. *Endocrine-Related Cancer*. 2019;26(10):R553-R66.
- 713 25. Wall MA, Turkarslan S, Wu W-J, Danziger SA, Reiss DJ, Mason MJ, et al. Genetic  
714 program activity delineates risk, relapse, and therapy responsiveness in multiple myeloma. *npj*  
715 *Precision Oncology*. 2021;5(1):1-15.
- 716 26. US National Institutes of Health. Relating clinical outcomes in multiple myeloma to  
717 personal assessment of genetic profile (CoMMpass). *Clinical Trials* website.  
718 <https://clinicaltrials.gov/ct2/show/NCT01454297>.
- 719 27. Kalff A, Spencer A. The t(4;14) translocation and FGFR3 overexpression in multiple  
720 myeloma: prognostic implications and current clinical strategies. *Blood Cancer Journal*.  
721 2012;2(9):e89-e.
- 722 28. Ashby C, Boyle EM, Bauer MA, Mikulasova A, Wardell CP, Williams L, et al. Structural  
723 variants shape the genomic landscape and clinical outcome of multiple myeloma. *Blood Cancer*  
724 *J*. 2022;12(5):85.
- 725 29. Shi L, Campbell G, Jones WD, Campagne F, Wen Z, Walker SJ, et al. The MicroArray  
726 Quality Control (MAQC)-II study of common practices for the development and validation of  
727 microarray-based predictive models. *Nature Biotechnology*. 2010;28(8):827-38.
- 728 30. Danziger SA, McConnell M, Gockley J, Young MH, Rosenthal A, Schmitz F, et al. Bone  
729 marrow microenvironments that contribute to patient outcomes in newly diagnosed multiple  
730 myeloma: A cohort study of patients in the Total Therapy clinical trials. *PLoS Med*.  
731 2020;17(11):e1003323.
- 732 31. Coffey DG, Cowan AJ, DeGraaff B, Martins TJ, Curley N, Green DJ, et al. High-  
733 Throughput Drug Screening and Multi-Omic Analysis to Guide Individualized Treatment for  
734 Multiple Myeloma. *JCO precision oncology*. 2021;5:PO.20.00442.
- 735 32. Huang Z, Zhang H, Boss J, Goutman SA, Mukherjee B, Dinov ID, et al. Complete hazard  
736 ranking to analyze right-censored data: An ALS survival study. *PLOS Computational Biology*.  
737 2017;13(12):e1005887.
- 738 33. Zou H, Hastie T. Regularization and Variable Selection via the Elastic Net. *Journal of the*  
739 *Royal Statistical Society Series B (Statistical Methodology)*. 2005;67(2):301-20.
- 740 34. bswhite. *bswhite/Celgene-Multiple-Myeloma-Challenge-Baseline-Models*. 2019.

- 741 35. Chng WJ, Dispenzieri A, Chim CS, Fonseca R, Goldschmidt H, Lentzsch S, et al. IMWG  
742 consensus on risk stratification in multiple myeloma. *Leukemia*. 2014;28(2):269-77.
- 743 36. Rajan AM, Rajkumar SV. Interpretation of cytogenetic results in multiple myeloma for  
744 clinical practice. *Blood Cancer J*. 2015;5(10):e365.
- 745 37. Rajkumar SV. Multiple myeloma: Every year a new standard? *Hematol Oncol*. 2019;37  
746 Suppl 1(Suppl 1):62-5.
- 747 38. Piccaluga PP, Agostinelli C, Califano A, Carbone A, Fantoni L, Ferrari S, et al. Gene  
748 expression analysis of angioimmunoblastic lymphoma indicates derivation from T follicular helper  
749 cells and vascular endothelial growth factor deregulation. *Cancer Research*. 2007;67(22):10703-  
750 10.
- 751 39. Dürig J, Bug S, Klein-Hitpass L, Boes T, Jöns T, Martin-Subero JI, et al. Combined single  
752 nucleotide polymorphism-based genomic mapping and global gene expression profiling identifies  
753 novel chromosomal imbalances, mechanisms and candidate genes important in the pathogenesis  
754 of T-cell prolymphocytic leukemia with inv(14)(q11q32). *Leukemia*. 2007;21(10):2153-63.
- 755 40. Concannon CG, Koehler BF, Reimertz C, Murphy BM, Bonner C, Thurow N, et al.  
756 Apoptosis induced by proteasome inhibition in cancer cells: predominant role of the p53/PUMA  
757 pathway. *Oncogene*. 2007;26(12):1681-92.
- 758 41. Osman I, Bajorin DF, Sun T-T, Zhong H, Douglas D, Scattergood J, et al. Novel blood  
759 biomarkers of human urinary bladder cancer. *Clinical Cancer Research: An Official Journal of the*  
760 *American Association for Cancer Research*. 2006;12(11 Pt 1):3374-80.
- 761 42. Alexanian R, Dimopoulos MA, Delasalle K, Barlogie B. Primary dexamethasone treatment  
762 of multiple myeloma. *Blood*. 1992;80(4):887-90.
- 763 43. Chari A, Vogl DT, Gavriatopoulou M, Nooka AK, Yee AJ, Huff CA, et al. Oral Selinexor-  
764 Dexamethasone for Triple-Class Refractory Multiple Myeloma. *N Engl J Med*. 2019;381(8):727-  
765 38.
- 766 44. Neumeister P, Schulz E, Pansy K, Szmyra M, Deutsch AJ. Targeting the  
767 Microenvironment for Treating Multiple Myeloma. *Int J Mol Sci*. 2022;23(14).
- 768 45. Quail DF, Joyce JA. Microenvironmental regulation of tumor progression and metastasis.  
769 *Nat Med*. 2013;19(11):1423-37.
- 770 46. van Nieuwenhuijzen N, Spaan I, Raymakers R, Peperzak V. From MGUS to Multiple  
771 Myeloma, a Paradigm for Clonal Evolution of Premalignant Cells. *Cancer Res*. 2018;78(10):2449-  
772 56.
- 773 47. Pawlyn C, Morgan GJ. Evolutionary biology of high-risk multiple myeloma. *Nat Rev*  
774 *Cancer*. 2017;17(9):543-56.



- 775 48. Ghobrial IM, Detappe A, Anderson KC, Steensma DP. The bone-marrow niche in MDS  
776 and MGUS: implications for AML and MM. *Nat Rev Clin Oncol.* 2018;15(4):219-33.
- 777 49. Kumar S, Baizer L, Callander NS, Giralt SA, Hillengass J, Freidlin B, et al. Gaps and  
778 opportunities in the treatment of relapsed-refractory multiple myeloma: Consensus  
779 recommendations of the NCI Multiple Myeloma Steering Committee. *Blood Cancer J.*  
780 2022;12(6):98.
- 781 50. Dingli D, Ailawadhi S, Bergsagel PL, Buadi FK, Dispenzieri A, Fonseca R, et al. Therapy  
782 for Relapsed Multiple Myeloma: Guidelines From the Mayo Stratification for Myeloma and Risk-  
783 Adapted Therapy. *Mayo Clin Proc.* 2017;92(4):578-98.
- 784 51. Hernandez-Rivas JA, Rios-Tamayo R, Encinas C, Alonso R, Lahuerta JJ. The changing  
785 landscape of relapsed and/or refractory multiple myeloma (MM): fundamentals and controversies.  
786 *Biomark Res.* 2022;10(1):1.
- 787 52. Delgado-Calle J, Kurihara N, Atkinson EG, Nelson J, Miyagawa K, Galmarini CM, et al.  
788 Aplidin (plitidepsin) is a novel anti-myeloma agent with potent anti-resorptive activity mediated by  
789 direct effects on osteoclasts. *Oncotarget.* 2019;10(28):2709-21.
- 790 53. Mitsiades CS, Ocio EM, Pandiella A, Maiso P, Gajate C, Garayoa M, et al. Aplidin, a  
791 marine organism-derived compound with potent antimyeloma activity in vitro and in vivo. *Cancer*  
792 *Research.* 2008;68(13):5216-25.
- 793 54. Shah V, Sherborne AL, Johnson DC, Ellis S, Price A, Chowdhury F, et al. Predicting  
794 ultrahigh risk multiple myeloma by molecular profiling: an analysis of newly diagnosed transplant  
795 eligible myeloma XI trial patients. *Leukemia.* 2020:1-6.
- 796
